# Supplementary material for: How repetitive are genomes?
Source: PubMed Central journal article supplement (PMC1769404; doi:10.1186/1471-2105-7-541), 2006-12-22
Supplement: 1471-2105-7-541-S1.pdf [file 1471-2105-7-541-S1.pdf]

# Supplementary material for *How repetitive are genomes?*

Bernhard Haubold & Thomas Wiehe

July 4, 2006

Table 1 lists  $I_r$  values for 330 completely sequenced prokaryote genomes sorted by  $I_r$  and Table 2 list the same information sorted by organism.

Table 1:  $I_r$  values for prokaryote genomes sorted by  $I_r$

| No. | Accession | Organism                                         | Size    | $I_r$  |
|-----|-----------|--------------------------------------------------|---------|--------|
| 1   | NC_007947 | Methylobacillus flagellatus KT                   | 2971517 | 6.3367 |
| 2   | NC_004368 | Streptococcus agalactiae NEM316                  | 2211485 | 4.8417 |
| 3   | NC_002936 | Dehalococcoides ethenogenes 195                  | 1469720 | 4.0257 |
| 4   | NC_006570 | Francisella tularensis subsp. tularensis SCHU S4 | 1892819 | 3.9503 |
| 5   | NC_003112 | Neisseria meningitidis MC58                      | 2272360 | 3.8422 |
| 6   | NC_007880 | Francisella tularensis subsp. holarctica         | 1895994 | 3.7227 |
| 7   | NC_002655 | Escherichia coli O157:H7 EDL933                  | 5528445 | 3.5209 |
| 8   | NC_005364 | Mycoplasma mycoides subsp. mycoides SC str. PG1  | 1211703 | 2.9206 |
| 9   | NC_002940 | Haemophilus ducreyi 35000HP                      | 1698955 | 2.8218 |
| 10  | NC_002488 | Xylella fastidiosa 9a5c                          | 2679306 | 2.7542 |
| 11  | NC_007575 | Thiomicrospira denitrificans ATCC 33889          | 2201561 | 2.6811 |
| 12  | NC_007712 | Sodalis glossinidius str. 'morsitans'            | 4171146 | 2.6269 |
| 13  | NC_005303 | Onion yellows phytoplasma OY-M                   | 860631  | 2.5371 |
| 14  | NC_005956 | Bartonella henselae str. Houston-1               | 1931047 | 2.3482 |
| 15  | NC_004556 | Xylella fastidiosa Temecula1                     | 2519802 | 2.2695 |
| 16  | NC_004337 | Shigella flexneri 2a str. 301                    | 4607203 | 2.1937 |
| 17  | NC_005955 | Bartonella quintana str. Toulouse                | 1581384 | 1.9798 |
| 18  | NC_002695 | Escherichia coli O157:H7                         | 5498450 | 1.9753 |
| 19  | NC_007613 | Shigella boydii Sb227                            | 4519823 | 1.9191 |
| 20  | NC_006349 | Burkholderia mallei ATCC 23344                   | 2325379 | 1.9111 |
| 21  | NC_003212 | Listeria innocua Clip11262                       | 3011208 | 1.8736 |
| 22  | NC_007606 | Shigella dysenteriae Sd197                       | 4369232 | 1.8411 |
| 23  | NC_003485 | Streptococcus pyogenes MGAS8232                  | 1895017 | 1.8374 |
| 24  | NC_000907 | Haemophilus influenzae Rd KW20                   | 1830138 | 1.8248 |
| 25  | NC_006086 | Streptococcus pyogenes MGAS10394                 | 1899877 | 1.8149 |
| 26  | NC_005126 | Photorhabdus luminescens subsp. laumondii TTO1   | 5688987 | 1.8043 |
| 27  | NC_007384 | Shigella sonnei Ss046                            | 4825265 | 1.7863 |
| 28  | NC_004116 | Streptococcus agalactiae 2603V/R                 | 2160267 | 1.7840 |
| 29  | NC_002950 | Porphyromonas gingivalis W83                     | 2343476 | 1.7821 |
| 30  | NC_004551 | Tropheryma whipplei TW08/27                      | 925938  | 1.7737 |
| 31  | NC_006449 | Streptococcus thermophilus CNRZ1066              | 1796226 | 1.7684 |
| 32  | NC_002927 | Bordetella bronchiseptica RB50                   | 5339179 | 1.7593 |
| 33  | NC_007797 | Anaplasma phagocytophilum HZ                     | 1471282 | 1.7544 |
| 34  | NC_003116 | Neisseria meningitidis Z2491                     | 2184406 | 1.7507 |
| 35  | NC_004606 | Streptococcus pyogenes SSI-1                     | 1894275 | 1.7407 |
| 36  | NC_007296 | Streptococcus pyogenes MGAS6180                  | 1897573 | 1.7299 |
| 37  | NC_007297 | Streptococcus pyogenes MGAS5005                  | 1838554 | 1.7275 |
| 38  | NC_004757 | Nitrosomonas europaea ATCC 19718                 | 2812094 | 1.7172 |
| 39  | NC_004070 | Streptococcus pyogenes MGAS315                   | 1900521 | 1.7159 |

*Continued on next page*

| <i>Prokaryote I<sub>r</sub> sorted by I<sub>r</sub>, continued from previous page</i> |           |                                                                 |         |                |
|---------------------------------------------------------------------------------------|-----------|-----------------------------------------------------------------|---------|----------------|
| No.                                                                                   | Accession | Organism                                                        | Size    | I <sub>r</sub> |
| 40                                                                                    | NC_002745 | Staphylococcus aureus subsp. aureus N315                        | 2814816 | 1.7159         |
| 41                                                                                    | NC_007432 | Streptococcus agalactiae A909                                   | 2127839 | 1.7154         |
| 42                                                                                    | NC_003028 | Streptococcus pneumoniae TIGR4                                  | 2160837 | 1.6901         |
| 43                                                                                    | NC_002978 | Wolbachia endosymbiont of Drosophila melanogaster               | 1267782 | 1.6783         |
| 44                                                                                    | NC_006448 | Streptococcus thermophilus LMG 18311                            | 1796846 | 1.6730         |
| 45                                                                                    | NC_005362 | Lactobacillus johnsonii NCC 533                                 | 1992676 | 1.6655         |
| 46                                                                                    | NC_006513 | Azoarcus sp. EbN1                                               | 4296230 | 1.6633         |
| 47                                                                                    | NC_002946 | Neisseria gonorrhoeae FA 1090                                   | 2153922 | 1.6629         |
| 48                                                                                    | NC_002929 | Bordetella pertussis Tohama I                                   | 4086189 | 1.6622         |
| 49                                                                                    | NC_007954 | Shewanella denitrificans OS217                                  | 4545906 | 1.6284         |
| 50                                                                                    | NC_004741 | Shigella flexneri 2a str. 2457T                                 | 4599354 | 1.6136         |
| 51                                                                                    | NC_007164 | Corynebacterium jeikeium K411                                   | 2462499 | 1.6055         |
| 52                                                                                    | NC_003198 | Salmonella enterica subsp. enterica serovar Typhi str. CT18     | 4809037 | 1.5869         |
| 53                                                                                    | NC_002662 | Lactococcus lactis subsp. lactis III1403                        | 2365589 | 1.5586         |
| 54                                                                                    | NC_003454 | Fusobacterium nucleatum subsp. nucleatum ATCC 25586             | 2174500 | 1.5457         |
| 55                                                                                    | NC_004572 | Tropheryma whipplei str. Twist                                  | 927303  | 1.5277         |
| 56                                                                                    | NC_004350 | Streptococcus mutans UA159                                      | 2030921 | 1.5233         |
| 57                                                                                    | NC_000915 | Helicobacter pylori 26695                                       | 1667867 | 1.5229         |
| 58                                                                                    | NC_006834 | Xanthomonas oryzae pv. oryzae KACC10331                         | 4941439 | 1.5119         |
| 59                                                                                    | NC_002976 | Staphylococcus epidermidis RP62A                                | 2616530 | 1.5083         |
| 60                                                                                    | NC_004088 | Yersinia pestis KIM                                             | 4600755 | 1.4926         |
| 61                                                                                    | NC_002163 | Campylobacter jejuni subsp. jejuni NCTC 11168                   | 1641481 | 1.4724         |
| 62                                                                                    | NC_005090 | Wolinella succinogenes DSM 1740                                 | 2110355 | 1.4649         |
| 63                                                                                    | NC_007576 | Lactobacillus sakei subsp. sakei 23K                            | 1884661 | 1.4584         |
| 64                                                                                    | NC_004347 | Shewanella oneidensis MR-1                                      | 4969803 | 1.4534         |
| 65                                                                                    | NC_003869 | Thermoanaerobacter tengcongensis MB4                            | 2689445 | 1.4486         |
| 66                                                                                    | NC_004369 | Corynebacterium efficiens YS-314                                | 3147090 | 1.4432         |
| 67                                                                                    | NC_003098 | Streptococcus pneumoniae R6                                     | 2038615 | 1.4171         |
| 68                                                                                    | NC_004578 | Pseudomonas syringae pv. tomato str. DC3000                     | 6397126 | 1.4096         |
| 69                                                                                    | NC_007955 | Methanococcoides burtonii DSM 6242                              | 2575032 | 1.4029         |
| 70                                                                                    | NC_003912 | Campylobacter jejuni RM1221                                     | 1777831 | 1.3956         |
| 71                                                                                    | NC_007520 | Thiomicrospira crunogena XCL-2                                  | 2427734 | 1.3829         |
| 72                                                                                    | NC_007146 | Haemophilus influenzae 86-028NP                                 | 1913428 | 1.3796         |
| 73                                                                                    | NC_007168 | Staphylococcus haemolyticus JCSC1435                            | 2685015 | 1.3731         |
| 74                                                                                    | NC_007204 | Psychrobacter arcticus 273-4                                    | 2650701 | 1.3618         |
| 75                                                                                    | NC_007406 | Nitrobacter winogradskyi Nb-255                                 | 3402093 | 1.3616         |
| 76                                                                                    | NC_006370 | Photobacterium profundum SS9                                    | 4085304 | 1.3569         |
| 77                                                                                    | NC_007512 | Pelodictyon luteolum DSM 273                                    | 2364842 | 1.3541         |
| 78                                                                                    | NC_004307 | Bifidobacterium longum NCC2705                                  | 2256640 | 1.3404         |
| 79                                                                                    | NC_002754 | Sulfolobus solfataricus P2                                      | 2992245 | 1.3393         |
| 80                                                                                    | NC_007716 | Aster yellows witches'-broom phytoplasma AYWB                   | 706569  | 1.3377         |
| 81                                                                                    | NC_006087 | Leifsonia xyli subsp. xyli str. CTCB07                          | 2584158 | 1.3358         |
| 82                                                                                    | NC_002758 | Staphylococcus aureus subsp. aureus Mu50                        | 2878529 | 1.3249         |
| 83                                                                                    | NC_003143 | Yersinia pestis CO92                                            | 4653728 | 1.3248         |
| 84                                                                                    | NC_002952 | Staphylococcus aureus subsp. aureus MRSA252                     | 2902619 | 1.3114         |
| 85                                                                                    | NC_002570 | Bacillus halodurans C-125                                       | 4202352 | 1.3077         |
| 86                                                                                    | NC_005810 | Yersinia pestis biovar Medievalis str. 91001                    | 4595065 | 1.3053         |
| 87                                                                                    | NC_004344 | Wigglesworthia glossinidia endosymbiont of Glossina brevipalpis | 697724  | 1.3027         |
| 88                                                                                    | NC_004631 | Salmonella enterica subsp. enterica serovar Typhi Ty2           | 4791961 | 1.2962         |
| 89                                                                                    | NC_004310 | Brucella suis 1330                                              | 2107794 | 1.2949         |
| 90                                                                                    | NC_006055 | Mesoplasma florum L1                                            | 793224  | 1.2860         |
| 91                                                                                    | NC_003888 | Streptomyces coelicolor A3(2)                                   | 8667507 | 1.2834         |
| 92                                                                                    | NC_007929 | Lactobacillus salivarius subsp. salivarius UCC118               | 1827111 | 1.2714         |
| 93                                                                                    | NC_002935 | Corynebacterium diphtheriae NCTC 13129                          | 2488635 | 1.2569         |
| 94                                                                                    | NC_007429 | Chlamydia trachomatis A/HAR-13                                  | 1044459 | 1.2527         |
| 95                                                                                    | NC_004193 | Oceanobacillus iheyensis HTE831                                 | 3630528 | 1.2412         |
| 96                                                                                    | NC_007796 | Methanospirillum hungatei JF-1                                  | 3544738 | 1.2400         |

*Continued on next page*

| Prokaryote $I_r$ sorted by $I_r$ , continued from previous page |           |                                                                        |         |        |
|-----------------------------------------------------------------|-----------|------------------------------------------------------------------------|---------|--------|
| No.                                                             | Accession | Organism                                                               | Size    | $I_r$  |
| 97                                                              | NC_005773 | Pseudomonas syringae pv. phaseolicola 1448A                            | 5928787 | 1.2336 |
| 98                                                              | NC_007614 | Nitrosospira multiformis ATCC 25196                                    | 3184243 | 1.2264 |
| 99                                                              | NC_006932 | Brucella abortus biovar 1 str. 9-941                                   | 2124241 | 1.2179 |
| 100                                                             | NC_007777 | Frankia sp. CcL3                                                       | 5433628 | 1.2133 |
| 101                                                             | NC_003552 | Methanosarcina acetivorans C2A                                         | 5751492 | 1.2088 |
| 102                                                             | NC_005966 | Acinetobacter sp. ADP1                                                 | 3598621 | 1.1968 |
| 103                                                             | NC_002973 | Listeria monocytogenes str. 4b F2365                                   | 2905187 | 1.1968 |
| 104                                                             | NC_006510 | Geobacillus kaustophilus HTA426                                        | 3544776 | 1.1875 |
| 105                                                             | NC_006526 | Zymomonas mobilis subsp. mobilis ZM4                                   | 2056416 | 1.1722 |
| 106                                                             | NC_002737 | Streptococcus pyogenes M1 GAS                                          | 1852441 | 1.1711 |
| 107                                                             | NC_003910 | Colwellia psychrerythraea 34H                                          | 5373180 | 1.1612 |
| 108                                                             | NC_003047 | Sinorhizobium meliloti 1021                                            | 3654135 | 1.1582 |
| 109                                                             | NC_002977 | Methylococcus capsulatus str. Bath                                     | 3304561 | 1.1542 |
| 110                                                             | NC_004547 | Erwinia carotovora subsp. atroseptica SCRI1043                         | 5064019 | 1.1497 |
| 111                                                             | NC_005085 | Chromobacterium violaceum ATCC 12472                                   | 4751080 | 1.1450 |
| 112                                                             | NC_004603 | Vibrio parahaemolyticus RIMD 2210633                                   | 3288558 | 1.1373 |
| 113                                                             | NC_007964 | Nitrobacter hamburgensis X14                                           | 4406967 | 1.1275 |
| 114                                                             | NC_006677 | Gluconobacter oxydans 621H                                             | 2702173 | 1.1275 |
| 115                                                             | NC_007481 | Pseudoalteromonas haloplanktis TAC125                                  | 3214944 | 1.1189 |
| 116                                                             | NC_006177 | Symbiobacterium thermophilum IAM 14863                                 | 3566135 | 1.1146 |
| 117                                                             | NC_000117 | Chlamydia trachomatis D/UW-3/CX                                        | 1042519 | 1.1124 |
| 118                                                             | NC_006511 | Salmonella enterica subsp. enterica serovar Paratyphi A str. ATCC 9150 | 4585229 | 1.1117 |
| 119                                                             | NC_007413 | Anabaena variabilis ATCC 29413                                         | 6365727 | 1.0871 |
| 120                                                             | NC_003210 | Listeria monocytogenes EGD-e                                           | 2944528 | 1.0798 |
| 121                                                             | NC_007626 | Magnetospirillum magneticum AMB-1                                      | 4967148 | 1.0752 |
| 122                                                             | NC_003197 | Salmonella typhimurium LT2                                             | 4857432 | 1.0644 |
| 123                                                             | NC_006300 | Mannheimia succiniciproducens MBEL55E                                  | 2314078 | 1.0513 |
| 124                                                             | NC_002928 | Bordetella parapertussis 12822                                         | 4773551 | 1.0371 |
| 125                                                             | NC_004431 | Escherichia coli CFT073                                                | 5231428 | 1.0265 |
| 126                                                             | NC_007517 | Geobacter metallireducens GS-15                                        | 3997420 | 1.0213 |
| 127                                                             | NC_004459 | Vibrio vulnificus CMCP6                                                | 3281945 | 1.0189 |
| 128                                                             | NC_007332 | Mycoplasma hyopneumoniae 7448                                          | 920079  | 1.0156 |
| 129                                                             | NC_007298 | Dechloromonas aromatica RCB                                            | 4501104 | 1.0127 |
| 130                                                             | NC_003911 | Silicibacter pomeroyi DSS-3                                            | 4109442 | 1.0099 |
| 131                                                             | NC_007651 | Burkholderia thailandensis E264                                        | 3809201 | 1.0086 |
| 132                                                             | NC_005071 | Prochlorococcus marinus str. MIT 9313                                  | 2410873 | 1.0086 |
| 133                                                             | NC_006840 | Vibrio fischeri ES114                                                  | 2906179 | 0.9957 |
| 134                                                             | NC_007109 | Rickettsia felis URRWXCal2                                             | 1485148 | 0.9924 |
| 135                                                             | NC_002663 | Pasteurella multocida subsp. multocida str. Pm70                       | 2257487 | 0.9920 |
| 136                                                             | NC_006905 | Salmonella enterica subsp. enterica serovar Choleraesuis str. SC-B67   | 4755700 | 0.9917 |
| 137                                                             | NC_007761 | Rhizobium etli CFN 42                                                  | 4381608 | 0.9900 |
| 138                                                             | NC_004113 | Thermosynechococcus elongatus BP-1                                     | 2593857 | 0.9895 |
| 139                                                             | NC_000918 | Aquifex aeolicus VF5                                                   | 1551335 | 0.9886 |
| 140                                                             | NC_006274 | Bacillus cereus E33L                                                   | 5300915 | 0.9827 |
| 141                                                             | NC_004722 | Bacillus cereus ATCC 14579                                             | 5411809 | 0.9823 |
| 142                                                             | NC_005139 | Vibrio vulnificus YJ016                                                | 3354505 | 0.9815 |
| 143                                                             | NC_004557 | Clostridium tetani E88                                                 | 2799251 | 0.9781 |
| 144                                                             | NC_002505 | Vibrio cholerae O1 biovar eltor str. N16961                            | 2961149 | 0.9737 |
| 145                                                             | NC_003450 | Corynebacterium glutamicum ATCC 13032                                  | 3309401 | 0.9734 |
| 146                                                             | NC_005791 | Methanococcus maripaludis S2                                           | 1661137 | 0.9724 |
| 147                                                             | NC_006833 | Wolbachia endosymbiont strain TRS of Brugia malayi                     | 1080084 | 0.9679 |
| 148                                                             | NC_003295 | Ralstonia solanacearum GMI1000                                         | 3716413 | 0.9614 |
| 149                                                             | NC_003901 | Methanosarcina mazei Go1                                               | 4096345 | 0.9588 |
| 150                                                             | NC_006369 | Legionella pneumophila str. Lens                                       | 3345687 | 0.9554 |
| 151                                                             | NC_000921 | Helicobacter pylori J99                                                | 1643831 | 0.9450 |
| 152                                                             | NC_003902 | Xanthomonas campestris pv. campestris str. ATCC 33913                  | 5076188 | 0.9445 |
| 153                                                             | NC_003030 | Clostridium acetobutylicum ATCC 824                                    | 3940880 | 0.9370 |

Continued on next page

| <i>Prokaryote I<sub>r</sub> sorted by I<sub>r</sub>, continued from previous page</i> |           |                                                               |         |                |
|---------------------------------------------------------------------------------------|-----------|---------------------------------------------------------------|---------|----------------|
| No.                                                                                   | Accession | Organism                                                      | Size    | I <sub>r</sub> |
| 154                                                                                   | NC_007513 | Synechococcus sp. CC9902                                      | 2234828 | 0.9351         |
| 155                                                                                   | NC_007519 | Desulfovibrio desulfuricans G20                               | 3730232 | 0.9349         |
| 156                                                                                   | NC_000919 | Treponema pallidum subsp. pallidum str. Nichols               | 1138011 | 0.9307         |
| 157                                                                                   | NC_007516 | Synechococcus sp. CC9605                                      | 2510659 | 0.9301         |
| 158                                                                                   | NC_005957 | Bacillus thuringiensis serovar konkukian str. 97-27           | 5237682 | 0.9296         |
| 159                                                                                   | NC_002947 | Pseudomonas putida KT2440                                     | 6181863 | 0.9178         |
| 160                                                                                   | NC_007775 | Synechococcus sp. JA-3-3Ab                                    | 2932766 | 0.8916         |
| 161                                                                                   | NC_004663 | Bacteroides thetaiotaomicron VPI-5482                         | 6260361 | 0.8864         |
| 162                                                                                   | NC_004668 | Enterococcus faecalis V583                                    | 3218031 | 0.8853         |
| 163                                                                                   | NC_007681 | Methanosphaera stadtmanae DSM 3091                            | 1767403 | 0.8824         |
| 164                                                                                   | NC_007350 | Staphylococcus saprophyticus subsp. saprophyticus ATCC 15305  | 2516575 | 0.8694         |
| 165                                                                                   | NC_002939 | Geobacter sulfurreducens PCA                                  | 3814139 | 0.8665         |
| 166                                                                                   | NC_003304 | Agrobacterium tumefaciens str. C58                            | 2841490 | 0.8590         |
| 167                                                                                   | NC_007294 | Mycoplasma synoviae 53                                        | 799476  | 0.8568         |
| 168                                                                                   | NC_006958 | Corynebacterium glutamicum ATCC 13032                         | 3282708 | 0.8566         |
| 169                                                                                   | NC_006155 | Yersinia pseudotuberculosis IP 32953                          | 4744671 | 0.8542         |
| 170                                                                                   | NC_007645 | Hahella chejuensis KCTC 2396                                  | 7215267 | 0.8519         |
| 171                                                                                   | NC_004842 | Anaplasma marginale str. St. Maries                           | 1197687 | 0.8497         |
| 172                                                                                   | NC_007907 | Desulfitobacterium hafniense Y51                              | 5727534 | 0.8341         |
| 173                                                                                   | NC_002677 | Mycobacterium leprae TN                                       | 3268203 | 0.8330         |
| 174                                                                                   | NC_002937 | Desulfovibrio vulgaris subsp. vulgaris str. Hildenborough     | 3570858 | 0.8278         |
| 175                                                                                   | NC_007354 | Ehrlichia canis str. Jake                                     | 1315030 | 0.8271         |
| 176                                                                                   | NC_007952 | Burkholderia xenovorans LB400                                 | 3363523 | 0.8259         |
| 177                                                                                   | NC_002620 | Chlamydia muridarum Nigg                                      | 1072950 | 0.8180         |
| 178                                                                                   | NC_006322 | Bacillus licheniformis ATCC 14580                             | 4222645 | 0.8166         |
| 179                                                                                   | NC_006368 | Legionella pneumophila str. Paris                             | 3503610 | 0.8133         |
| 180                                                                                   | NC_006512 | Idiomarina loihiensis L2TR                                    | 2839318 | 0.8116         |
| 181                                                                                   | NC_002516 | Pseudomonas aeruginosa PAO1                                   | 6264403 | 0.8098         |
| 182                                                                                   | NC_007794 | Novosphingobium aromaticivorans DSM 12444                     | 3561584 | 0.8086         |
| 183                                                                                   | NC_003228 | Bacteroides fragilis NCTC 9343                                | 5205140 | 0.8064         |
| 184                                                                                   | NC_007940 | Rickettsia bellii RML369-C                                    | 1522076 | 0.7991         |
| 185                                                                                   | NC_007492 | Pseudomonas fluorescens PfO-1                                 | 6438405 | 0.7972         |
| 186                                                                                   | NC_004829 | Mycoplasma gallisepticum R                                    | 996422  | 0.7969         |
| 187                                                                                   | NC_007086 | Xanthomonas campestris pv. campestris str. 8004               | 5148708 | 0.7958         |
| 188                                                                                   | NC_004432 | Mycoplasma penetrans HF-2                                     | 1358633 | 0.7897         |
| 189                                                                                   | NC_002971 | Coxiella burnetii RSA 493                                     | 1995281 | 0.7864         |
| 190                                                                                   | NC_000911 | Synechocystis sp. PCC 6803                                    | 3573470 | 0.7764         |
| 191                                                                                   | NC_007498 | Pelobacter carbinolicus DSM 2380                              | 3665893 | 0.7718         |
| 192                                                                                   | AC_000091 | Escherichia coli W3110                                        | 4646332 | 0.7717         |
| 193                                                                                   | NC_002951 | Staphylococcus aureus subsp. aureus COL                       | 2809422 | 0.7696         |
| 194                                                                                   | NC_003317 | Brucella melitensis 16M                                       | 2117144 | 0.7690         |
| 195                                                                                   | NC_003997 | Bacillus anthracis str. Ames                                  | 5227293 | 0.7686         |
| 196                                                                                   | NC_003909 | Bacillus cereus ATCC 10987                                    | 5224283 | 0.7650         |
| 197                                                                                   | NC_004461 | Staphylococcus epidermidis ATCC 12228                         | 2499279 | 0.7623         |
| 198                                                                                   | NC_004567 | Lactobacillus plantarum WCFS1                                 | 3308274 | 0.7578         |
| 199                                                                                   | NC_007946 | Escherichia coli UTI89                                        | 5065741 | 0.7572         |
| 200                                                                                   | NC_006138 | Desulfotalea psychrophila LSv54                               | 3523383 | 0.7555         |
| 201                                                                                   | NC_005945 | Bacillus anthracis str. Sterne                                | 5228663 | 0.7502         |
| 202                                                                                   | NC_007622 | Staphylococcus aureus RF122                                   | 2742531 | 0.7407         |
| 203                                                                                   | NC_007530 | Bacillus anthracis str. 'Ames Ancestor'                       | 5227419 | 0.7353         |
| 204                                                                                   | NC_007908 | Rhodospirillum rubrum DSM 15236                               | 4712337 | 0.7239         |
| 205                                                                                   | NC_006350 | Burkholderia pseudomallei K96243                              | 4074542 | 0.7214         |
| 206                                                                                   | NC_007618 | Brucella melitensis biovar Abortus 2308                       | 2121359 | 0.7144         |
| 207                                                                                   | NC_000913 | Escherichia coli K12                                          | 4639675 | 0.7124         |
| 208                                                                                   | NC_003272 | Nostoc sp. PCC 7120                                           | 6413771 | 0.7108         |
| 209                                                                                   | NC_002942 | Legionella pneumophila subsp. pneumophila str. Philadelphia 1 | 3397754 | 0.7081         |
| 210                                                                                   | NC_007759 | Syntrophus aciditrophicus SB                                  | 3179300 | 0.7056         |

*Continued on next page*

| <i>Prokaryote <math>I_r</math> sorted by <math>I_r</math>, continued from previous page</i> |           |                                                                |         |        |
|---------------------------------------------------------------------------------------------|-----------|----------------------------------------------------------------|---------|--------|
| No.                                                                                         | Accession | Organism                                                       | Size    | $I_r$  |
| 211                                                                                         | NC_002771 | Mycoplasma pulmonis UAB CTIP                                   | 963879  | 0.7040 |
| 212                                                                                         | NC_007604 | Synechococcus elongatus PCC 7942                               | 2695903 | 0.6997 |
| 213                                                                                         | NC_007643 | Rhodospirillum rubrum ATCC 11170                               | 4352825 | 0.6971 |
| 214                                                                                         | NC_002696 | Caulobacter crescentus CB15                                    | 4016947 | 0.6965 |
| 215                                                                                         | NC_006814 | Lactobacillus acidophilus NCFM                                 | 1993564 | 0.6904 |
| 216                                                                                         | NC_003919 | Xanthomonas axonopodis pv. citri str. 306                      | 5175554 | 0.6897 |
| 217                                                                                         | NC_003923 | Staphylococcus aureus subsp. aureus MW2                        | 2820462 | 0.6857 |
| 218                                                                                         | NC_006576 | Synechococcus elongatus PCC 6301                               | 2696255 | 0.6855 |
| 219                                                                                         | NC_007503 | Carboxydotherrmus hydrogenoformans Z-2901                      | 2401520 | 0.6723 |
| 220                                                                                         | NC_006347 | Bacteroides fragilis YCH46                                     | 5277274 | 0.6711 |
| 221                                                                                         | NC_003366 | Clostridium perfringens str. 13                                | 3031430 | 0.6648 |
| 222                                                                                         | NC_006461 | Thermus thermophilus HB8                                       | 1849742 | 0.6630 |
| 223                                                                                         | NC_002953 | Staphylococcus aureus subsp. aureus MSSA476                    | 2799802 | 0.6539 |
| 224                                                                                         | NC_002932 | Chlorobium tepidum TLS                                         | 2154946 | 0.6508 |
| 225                                                                                         | NC_007508 | Xanthomonas campestris pv. vesicatoria str. 85-10              | 5178466 | 0.6424 |
| 226                                                                                         | NC_007793 | Staphylococcus aureus subsp. aureus USA300                     | 2872769 | 0.6384 |
| 227                                                                                         | NC_007355 | Methanosarcina barkeri str. fusaro                             | 4837408 | 0.6314 |
| 228                                                                                         | NC_007404 | Thiobacillus denitrificans ATCC 25259                          | 2909809 | 0.6284 |
| 229                                                                                         | NC_002944 | Mycobacterium avium subsp. paratuberculosis K-10               | 4829781 | 0.6248 |
| 230                                                                                         | NC_007333 | Thermobifida fusca YX                                          | 3642249 | 0.6165 |
| 231                                                                                         | NC_007295 | Mycoplasma hyopneumoniae J                                     | 897405  | 0.6136 |
| 232                                                                                         | NC_004342 | Leptospira interrogans serovar Lai str. 56601                  | 4332241 | 0.6134 |
| 233                                                                                         | NC_005070 | Synechococcus sp. WH 8102                                      | 2434428 | 0.6132 |
| 234                                                                                         | NC_006270 | Bacillus licheniformis ATCC 14580                              | 4222334 | 0.6127 |
| 235                                                                                         | NC_003155 | Streptomyces avermitilis MA-4680                               | 9025608 | 0.6095 |
| 236                                                                                         | NC_007776 | Synechococcus sp. JA-2-3B'a(2-13)                              | 3046682 | 0.6063 |
| 237                                                                                         | NC_004463 | Bradyrhizobium japonicum USDA 110                              | 9105828 | 0.6055 |
| 238                                                                                         | NC_003062 | Agrobacterium tumefaciens str. C58                             | 2841581 | 0.5977 |
| 239                                                                                         | NC_004129 | Pseudomonas fluorescens Pf-5                                   | 7074893 | 0.5945 |
| 240                                                                                         | NC_007005 | Pseudomonas syringae pv. syringae B728a                        | 6093698 | 0.5924 |
| 241                                                                                         | NC_001263 | Deinococcus radiodurans R1                                     | 2648638 | 0.5870 |
| 242                                                                                         | NC_002678 | Mesorhizobium loti MAFF303099                                  | 7036071 | 0.5815 |
| 243                                                                                         | NC_007514 | Chlorobium chlorochromatii CaD3                                | 2572079 | 0.5804 |
| 244                                                                                         | NC_007795 | Staphylococcus aureus subsp. aureus NCTC 8325                  | 2821361 | 0.5725 |
| 245                                                                                         | NC_007434 | Burkholderia pseudomallei 1710b                                | 4126292 | 0.5723 |
| 246                                                                                         | NC_007925 | Rhodopseudomonas palustris BisB18                              | 5513844 | 0.5676 |
| 247                                                                                         | NC_000964 | Bacillus subtilis subsp. subtilis str. 168                     | 4214630 | 0.5659 |
| 248                                                                                         | NC_000962 | Mycobacterium tuberculosis H37Rv                               | 4411532 | 0.5647 |
| 249                                                                                         | NC_006156 | Borrelia garinii PBi                                           | 904246  | 0.5534 |
| 250                                                                                         | NC_006085 | Propionibacterium acnes KPA171202                              | 2560265 | 0.5514 |
| 251                                                                                         | NC_007484 | Nitrosococcus oceani ATCC 19707                                | 3481691 | 0.5504 |
| 252                                                                                         | NC_002967 | Treponema denticola ATCC 35405                                 | 2843201 | 0.5407 |
| 253                                                                                         | NC_007958 | Rhodopseudomonas palustris BisB5                               | 4892717 | 0.5391 |
| 254                                                                                         | NC_007963 | Chromohalobacter salexigens DSM 3043                           | 3696649 | 0.5310 |
| 255                                                                                         | NC_005027 | Rhodopirellula baltica SH 1                                    | 7145576 | 0.5292 |
| 256                                                                                         | NC_005835 | Thermus thermophilus HB27                                      | 1894877 | 0.5242 |
| 257                                                                                         | NC_002162 | Ureaplasma parvum serovar 3 str. ATCC 700970                   | 751719  | 0.5090 |
| 258                                                                                         | NC_007644 | Moorella thermoacetica ATCC 39073                              | 2628784 | 0.5089 |
| 259                                                                                         | NC_005823 | Leptospira interrogans serovar Copenhageni str. Fiocruz L1-130 | 4277185 | 0.4965 |
| 260                                                                                         | NC_007912 | Saccharophagus degradans 2-40                                  | 5057531 | 0.4931 |
| 261                                                                                         | NC_005861 | Candidatus Protochlamydia amoebophila UWE25                    | 2414465 | 0.4693 |
| 262                                                                                         | NC_005363 | Bdellovibrio bacteriovorus HD100                               | 3782950 | 0.4658 |
| 263                                                                                         | NC_002755 | Mycobacterium tuberculosis CDC1551                             | 4403837 | 0.4530 |
| 264                                                                                         | NC_007348 | Ralstonia eutropha JMP134                                      | 2726152 | 0.4505 |
| 265                                                                                         | NC_006582 | Bacillus clausii KSM-K16                                       | 4303871 | 0.4499 |
| 266                                                                                         | NC_005296 | Rhodopseudomonas palustris CGA009                              | 5459213 | 0.4375 |
| 267                                                                                         | NC_000916 | Methanothermobacter thermautotrophicus str. Delta H            | 1751377 | 0.4256 |

*Continued on next page*

Prokaryote  $I_r$  sorted by  $I_r$ , continued from previous page

| No. | Accession | Organism                                              | Size    | $I_r$  |
|-----|-----------|-------------------------------------------------------|---------|--------|
| 268 | NC_006908 | Mycoplasma mobile 163K                                | 777079  | 0.4222 |
| 269 | NC_007799 | Ehrlichia chaffeensis str. Arkansas                   | 1176248 | 0.4214 |
| 270 | NC_006624 | Thermococcus kodakarensis KOD1                        | 2088737 | 0.4197 |
| 271 | NC_002945 | Mycobacterium bovis AF2122/97                         | 4345492 | 0.4082 |
| 272 | NC_003413 | Pyrococcus furiosus DSM 3638                          | 1908256 | 0.3974 |
| 273 | NC_004917 | Helicobacter hepaticus ATCC 51449                     | 1799146 | 0.3778 |
| 274 | NC_007633 | Mycoplasma capricolum subsp. capricolum ATCC 27343    | 1010023 | 0.3692 |
| 275 | NC_005125 | Gloeobacter violaceus PCC 7421                        | 4659019 | 0.3608 |
| 276 | NC_003106 | Sulfolobus tokodaii str. 7                            | 2694756 | 0.3584 |
| 277 | NC_003364 | Pyrobaculum aerophilum str. IM2                       | 2222430 | 0.3478 |
| 278 | NC_004552 | Chlamydomphila abortus S26/3                          | 1144377 | 0.3441 |
| 279 | NC_006360 | Mycoplasma hyopneumoniae 232                          | 892758  | 0.3422 |
| 280 | NC_001318 | Borrelia burgdorferi B31                              | 910724  | 0.3405 |
| 281 | NC_000912 | Mycoplasma pneumoniae M129                            | 816394  | 0.3394 |
| 282 | NC_007335 | Prochlorococcus marinus str. NATL2A                   | 1842899 | 0.3312 |
| 283 | NC_002607 | Halobacterium sp. NRC-1                               | 2014239 | 0.3272 |
| 284 | NC_005295 | Ehrlichia ruminantium str. Welgevonden                | 1516355 | 0.3254 |
| 285 | NC_000917 | Archaeoglobus fulgidus DSM 4304                       | 2178400 | 0.3239 |
| 286 | NC_007760 | Anaeromyxobacter dehalogenans 2CP-C                   | 5013479 | 0.3135 |
| 287 | NC_007948 | Polaromonas sp. JS666                                 | 5200264 | 0.3134 |
| 288 | NC_002179 | Chlamydomphila pneumoniae AR39                        | 1229853 | 0.3040 |
| 289 | NC_000909 | Methanocaldococcus jannaschii DSM 2661                | 1664970 | 0.2940 |
| 290 | NC_005043 | Chlamydomphila pneumoniae TW-183                      | 1225935 | 0.2793 |
| 291 | NC_006831 | Ehrlichia ruminantium str. Gardel                     | 1499920 | 0.2770 |
| 292 | NC_003361 | Chlamydomphila caviae GPIC                            | 1173390 | 0.2669 |
| 293 | NC_006361 | Nocardia farcinica IFM 10152                          | 6021225 | 0.2595 |
| 294 | NC_006832 | Ehrlichia ruminantium str. Welgevonden                | 1512977 | 0.2471 |
| 295 | NC_006396 | Haloarcula marismortui ATCC 43049                     | 3131724 | 0.2318 |
| 296 | NC_000922 | Chlamydomphila pneumoniae CWL029                      | 1230230 | 0.2283 |
| 297 | NC_007722 | Erythrobacter litoralis HTCC2594                      | 3052398 | 0.2031 |
| 298 | NC_007356 | Dehalococcoides sp. CBDB1                             | 1395502 | 0.1714 |
| 299 | NC_007677 | Salinibacter ruber DSM 13855                          | 3551823 | 0.1685 |
| 300 | NC_002689 | Thermoplasma volcanium GSS1                           | 1584804 | 0.1651 |
| 301 | NC_007802 | Jannaschia sp. CCS1                                   | 4317977 | 0.1633 |
| 302 | NC_000853 | Thermotoga maritima MSB8                              | 1860725 | 0.1608 |
| 303 | NC_007577 | Prochlorococcus marinus str. MIT 9312                 | 1709204 | 0.1503 |
| 304 | NC_000908 | Mycoplasma genitalium G37                             | 580074  | 0.1377 |
| 305 | NC_007426 | Natronomonas pharaonis DSM 2160                       | 2595221 | 0.1352 |
| 306 | NC_002491 | Chlamydomphila pneumoniae J138                        | 1226565 | 0.1349 |
| 307 | NC_007778 | Rhodospseudomonas palustris HaA2                      | 5331656 | 0.1193 |
| 308 | NC_005072 | Prochlorococcus marinus subsp. pastoris str. CCMP1986 | 1657990 | 0.1149 |
| 309 | NC_000854 | Aeropyrum pernix K1                                   | 1669695 | 0.1048 |
| 310 | NC_003103 | Rickettsia conorii str. Malish 7                      | 1268755 | 0.0968 |
| 311 | NC_007493 | Rhodobacter sphaeroides 2.4.1                         | 3188609 | 0.0892 |
| 312 | NC_007509 | Burkholderia sp. 383                                  | 1395069 | 0.0882 |
| 313 | NC_000961 | Pyrococcus horikoshii OT3                             | 1738505 | 0.0856 |
| 314 | NC_007205 | Candidatus Pelagibacter ubique HTCC1062               | 1308759 | 0.0787 |
| 315 | NC_000868 | Pyrococcus abyssi GE5                                 | 1765118 | 0.0713 |
| 316 | NC_005877 | Picrophilus torridus DSM 9790                         | 1545895 | 0.0702 |
| 317 | NC_006142 | Rickettsia typhi str. Wilmington                      | 1111496 | 0.0607 |
| 318 | NC_002578 | Thermoplasma acidophilum DSM 1728                     | 1564906 | 0.0577 |
| 319 | NC_003551 | Methanopyrus kandleri AV19                            | 1694969 | 0.0532 |
| 320 | NC_000963 | Rickettsia prowazekii str. Madrid E                   | 1111523 | 0.0514 |
| 321 | NC_005213 | Nanoarchaeum equitans Kin4-M                          | 490885  | 0.0482 |
| 322 | NC_007798 | Neorickettsia sennetsu str. Miyayama                  | 859006  | 0.0452 |
| 323 | NC_007181 | Sulfolobus acidocaldarius DSM 639                     | 2225959 | 0.0428 |
| 324 | NC_005042 | Prochlorococcus marinus subsp. marinus str. CCMP1375  | 1751080 | 0.0373 |

Continued on next page

*Prokaryote  $I_r$  sorted by  $I_r$ , continued from previous page*

| No. | Accession | Organism                                           | Size    | $I_r$  |
|-----|-----------|----------------------------------------------------|---------|--------|
| 325 | NC_005061 | Candidatus Blochmannia floridanus                  | 705557  | 0.0325 |
| 326 | NC_007292 | Candidatus Blochmannia pennsylvanicus str. BPEN    | 791654  | 0.0293 |
| 327 | NC_004061 | Buchnera aphidicola str. Sg (Schizaphis graminum)  | 641454  | 0.0293 |
| 328 | NC_007899 | Chlamydophila felis Fe/C-56                        | 1166239 | 0.0284 |
| 329 | NC_002528 | Buchnera aphidicola str. APS (Acyrthosiphon pisum) | 640681  | 0.0253 |
| 330 | NC_004545 | Buchnera aphidicola str. Bp (Baizongia pistaciae)  | 615980  | 0.0189 |

Table 2:  $I_r$  values for prokaryotes sorted alphabetically

| No. | Accession | Organism                                            | Size    | $I_r$  |
|-----|-----------|-----------------------------------------------------|---------|--------|
| 1   | NC_005966 | Acinetobacter sp. ADP1                              | 3598621 | 1.1968 |
| 2   | NC_000854 | Aeropyrum pernix K1                                 | 1669695 | 0.1048 |
| 3   | NC_003304 | Agrobacterium tumefaciens str. C58                  | 2841490 | 0.8590 |
| 4   | NC_003062 | Agrobacterium tumefaciens str. C58                  | 2841581 | 0.5977 |
| 5   | NC_007413 | Anabaena variabilis ATCC 29413                      | 6365727 | 1.0871 |
| 6   | NC_007760 | Anaeromyxobacter dehalogenans 2CP-C                 | 5013479 | 0.3135 |
| 7   | NC_004842 | Anaplasma marginale str. St. Maries                 | 1197687 | 0.8497 |
| 8   | NC_007797 | Anaplasma phagocytophilum HZ                        | 1471282 | 1.7544 |
| 9   | NC_000918 | Aquifex aeolicus VF5                                | 1551335 | 0.9886 |
| 10  | NC_000917 | Archaeoglobus fulgidus DSM 4304                     | 2178400 | 0.3239 |
| 11  | NC_007716 | Aster yellows witches'-broom phytoplasma AYWB       | 706569  | 1.3377 |
| 12  | NC_006513 | Azoarcus sp. EbN1                                   | 4296230 | 1.6633 |
| 13  | NC_007530 | Bacillus anthracis str. 'Ames Ancestor'             | 5227419 | 0.7353 |
| 14  | NC_003997 | Bacillus anthracis str. Ames                        | 5227293 | 0.7686 |
| 15  | NC_005945 | Bacillus anthracis str. Sterne                      | 5228663 | 0.7502 |
| 16  | NC_003909 | Bacillus cereus ATCC 10987                          | 5224283 | 0.7650 |
| 17  | NC_004722 | Bacillus cereus ATCC 14579                          | 5411809 | 0.9823 |
| 18  | NC_006274 | Bacillus cereus E33L                                | 5300915 | 0.9827 |
| 19  | NC_006582 | Bacillus clausii KSM-K16                            | 4303871 | 0.4499 |
| 20  | NC_002570 | Bacillus halodurans C-125                           | 4202352 | 1.3077 |
| 21  | NC_006270 | Bacillus licheniformis ATCC 14580                   | 4222334 | 0.6127 |
| 22  | NC_006322 | Bacillus licheniformis ATCC 14580                   | 4222645 | 0.8166 |
| 23  | NC_000964 | Bacillus subtilis subsp. subtilis str. 168          | 4214630 | 0.5659 |
| 24  | NC_005957 | Bacillus thuringiensis serovar konkukian str. 97-27 | 5237682 | 0.9296 |
| 25  | NC_003228 | Bacteroides fragilis NCTC 9343                      | 5205140 | 0.8064 |
| 26  | NC_006347 | Bacteroides fragilis YCH46                          | 5277274 | 0.6711 |
| 27  | NC_004663 | Bacteroides thetaiotaomicron VPI-5482               | 6260361 | 0.8864 |
| 28  | NC_005956 | Bartonella henselae str. Houston-1                  | 1931047 | 2.3482 |
| 29  | NC_005955 | Bartonella quintana str. Toulouse                   | 1581384 | 1.9798 |
| 30  | NC_005363 | Bdellovibrio bacteriovorus HD100                    | 3782950 | 0.4658 |
| 31  | NC_004307 | Bifidobacterium longum NCC2705                      | 2256640 | 1.3404 |
| 32  | NC_002927 | Bordetella bronchiseptica RB50                      | 5339179 | 1.7593 |
| 33  | NC_002928 | Bordetella parapertussis 12822                      | 4773551 | 1.0371 |
| 34  | NC_002929 | Bordetella pertussis Tohama I                       | 4086189 | 1.6622 |
| 35  | NC_001318 | Borrelia burgdorferi B31                            | 910724  | 0.3405 |
| 36  | NC_006156 | Borrelia garinii PBi                                | 904246  | 0.5534 |
| 37  | NC_004463 | Bradyrhizobium japonicum USDA 110                   | 9105828 | 0.6055 |
| 38  | NC_006932 | Brucella abortus biovar 1 str. 9-941                | 2124241 | 1.2179 |
| 39  | NC_003317 | Brucella melitensis 16M                             | 2117144 | 0.7690 |
| 40  | NC_007618 | Brucella melitensis biovar Abortus 2308             | 2121359 | 0.7144 |
| 41  | NC_004310 | Brucella suis 1330                                  | 2107794 | 1.2949 |
| 42  | NC_002528 | Buchnera aphidicola str. APS (Acyrtosiphon pisum)   | 640681  | 0.0253 |
| 43  | NC_004545 | Buchnera aphidicola str. Bp (Baizongia pistaciae)   | 615980  | 0.0189 |
| 44  | NC_004061 | Buchnera aphidicola str. Sg (Schizaphis graminum)   | 641454  | 0.0293 |
| 45  | NC_006349 | Burkholderia mallei ATCC 23344                      | 2325379 | 1.9111 |
| 46  | NC_007434 | Burkholderia pseudomallei 1710b                     | 4126292 | 0.5723 |
| 47  | NC_006350 | Burkholderia pseudomallei K96243                    | 4074542 | 0.7214 |
| 48  | NC_007509 | Burkholderia sp. 383                                | 1395069 | 0.0882 |
| 49  | NC_007651 | Burkholderia thailandensis E264                     | 3809201 | 1.0086 |
| 50  | NC_007952 | Burkholderia xenovorans LB400                       | 3363523 | 0.8259 |
| 51  | NC_003912 | Campylobacter jejuni RM1221                         | 1777831 | 1.3956 |
| 52  | NC_002163 | Campylobacter jejuni subsp. jejuni NCTC 11168       | 1641481 | 1.4724 |
| 53  | NC_005061 | Candidatus Blochmannia floridanus                   | 705557  | 0.0325 |
| 54  | NC_007292 | Candidatus Blochmannia pennsylvanicus str. BPEN     | 791654  | 0.0293 |
| 55  | NC_007205 | Candidatus Pelagibacter ubique HTCC1062             | 1308759 | 0.0787 |

Continued on next page



Prokaryote  $I_r$  sorted alphabetically, continued from previous page

| No. | Accession | Organism                                                  | Size    | $I_r$  |
|-----|-----------|-----------------------------------------------------------|---------|--------|
| 56  | NC_005861 | Candidatus Protochlamydia amoebophila UWE25               | 2414465 | 0.4693 |
| 57  | NC_007503 | Carboxydotherrnus hydrogenoformans Z-2901                 | 2401520 | 0.6723 |
| 58  | NC_002696 | Caulobacter crescentus CB15                               | 4016947 | 0.6965 |
| 59  | NC_002620 | Chlamydia muridarum Nigg                                  | 1072950 | 0.8180 |
| 60  | NC_007429 | Chlamydia trachomatis A/HAR-13                            | 1044459 | 1.2527 |
| 61  | NC_000117 | Chlamydia trachomatis D/UW-3/CX                           | 1042519 | 1.1124 |
| 62  | NC_004552 | Chlamydomphila abortus S26/3                              | 1144377 | 0.3441 |
| 63  | NC_003361 | Chlamydomphila caviae GPIC                                | 1173390 | 0.2669 |
| 64  | NC_007899 | Chlamydomphila felis Fe/C-56                              | 1166239 | 0.0284 |
| 65  | NC_002179 | Chlamydomphila pneumoniae AR39                            | 1229853 | 0.3040 |
| 66  | NC_000922 | Chlamydomphila pneumoniae CWL029                          | 1230230 | 0.2283 |
| 67  | NC_002491 | Chlamydomphila pneumoniae J138                            | 1226565 | 0.1349 |
| 68  | NC_005043 | Chlamydomphila pneumoniae TW-183                          | 1225935 | 0.2793 |
| 69  | NC_007514 | Chlorobium chlorochromatii CaD3                           | 2572079 | 0.5804 |
| 70  | NC_002932 | Chlorobium tepidum TLS                                    | 2154946 | 0.6508 |
| 71  | NC_005085 | Chromobacterium violaceum ATCC 12472                      | 4751080 | 1.1450 |
| 72  | NC_007963 | Chromohalobacter salexigens DSM 3043                      | 3696649 | 0.5310 |
| 73  | NC_003030 | Clostridium acetobutylicum ATCC 824                       | 3940880 | 0.9370 |
| 74  | NC_003366 | Clostridium perfringens str. 13                           | 3031430 | 0.6648 |
| 75  | NC_004557 | Clostridium tetani E88                                    | 2799251 | 0.9781 |
| 76  | NC_003910 | Colwellia psychrerythraea 34H                             | 5373180 | 1.1612 |
| 77  | NC_002935 | Corynebacterium diphtheriae NCTC 13129                    | 2488635 | 1.2569 |
| 78  | NC_004369 | Corynebacterium efficiens YS-314                          | 3147090 | 1.4432 |
| 79  | NC_006958 | Corynebacterium glutamicum ATCC 13032                     | 3282708 | 0.8566 |
| 80  | NC_003450 | Corynebacterium glutamicum ATCC 13032                     | 3309401 | 0.9734 |
| 81  | NC_007164 | Corynebacterium jeikeium K411                             | 2462499 | 1.6055 |
| 82  | NC_002971 | Coxiella burnetii RSA 493                                 | 1995281 | 0.7864 |
| 83  | NC_007298 | Dechloromonas aromatica RCB                               | 4501104 | 1.0127 |
| 84  | NC_002936 | Dehalococcoides ethenogenes 195                           | 1469720 | 4.0257 |
| 85  | NC_007356 | Dehalococcoides sp. CBDB1                                 | 1395502 | 0.1714 |
| 86  | NC_001263 | Deinococcus radiodurans R1                                | 2648638 | 0.5870 |
| 87  | NC_007907 | Desulfitobacterium hafniense Y51                          | 5727534 | 0.8341 |
| 88  | NC_006138 | Desulfotalea psychrophila LSv54                           | 3523383 | 0.7555 |
| 89  | NC_007519 | Desulfovibrio desulfuricans G20                           | 3730232 | 0.9349 |
| 90  | NC_002937 | Desulfovibrio vulgaris subsp. vulgaris str. Hildenborough | 3570858 | 0.8278 |
| 91  | NC_007354 | Ehrlichia canis str. Jake                                 | 1315030 | 0.8271 |
| 92  | NC_007799 | Ehrlichia chaffeensis str. Arkansas                       | 1176248 | 0.4214 |
| 93  | NC_006831 | Ehrlichia ruminantium str. Gardel                         | 1499920 | 0.2770 |
| 94  | NC_006832 | Ehrlichia ruminantium str. Welgevonden                    | 1512977 | 0.2471 |
| 95  | NC_005295 | Ehrlichia ruminantium str. Welgevonden                    | 1516355 | 0.3254 |
| 96  | NC_004668 | Enterococcus faecalis V583                                | 3218031 | 0.8853 |
| 97  | NC_004547 | Erwinia carotovora subsp. atroseptica SCRI1043            | 5064019 | 1.1497 |
| 98  | NC_007722 | Erythrobacter litoralis HTCC2594                          | 3052398 | 0.2031 |
| 99  | NC_004431 | Escherichia coli CFT073                                   | 5231428 | 1.0265 |
| 100 | NC_000913 | Escherichia coli K12                                      | 4639675 | 0.7124 |
| 101 | NC_002655 | Escherichia coli O157:H7 EDL933                           | 5528445 | 3.5209 |
| 102 | NC_002695 | Escherichia coli O157:H7                                  | 5498450 | 1.9753 |
| 103 | NC_007946 | Escherichia coli UTI89                                    | 5065741 | 0.7572 |
| 104 | AC_000091 | Escherichia coli W3110                                    | 4646332 | 0.7717 |
| 105 | NC_007880 | Francisella tularensis subsp. holarctica                  | 1895994 | 3.7227 |
| 106 | NC_006570 | Francisella tularensis subsp. tularensis SCHU S4          | 1892819 | 3.9503 |
| 107 | NC_007777 | Frankia sp. CcI3                                          | 5433628 | 1.2133 |
| 108 | NC_003454 | Fusobacterium nucleatum subsp. nucleatum ATCC 25586       | 2174500 | 1.5457 |
| 109 | NC_006510 | Geobacillus kaustophilus HTA426                           | 3544776 | 1.1875 |
| 110 | NC_007517 | Geobacter metallireducens GS-15                           | 3997420 | 1.0213 |
| 111 | NC_002939 | Geobacter sulfurreducens PCA                              | 3814139 | 0.8665 |
| 112 | NC_005125 | Gloeobacter violaceus PCC 7421                            | 4659019 | 0.3608 |

Continued on next page

| <i>Prokaryote I<sub>r</sub> sorted alphabetically, continued from previous page</i> |           |                                                                |         |                |
|-------------------------------------------------------------------------------------|-----------|----------------------------------------------------------------|---------|----------------|
| No.                                                                                 | Accession | Organism                                                       | Size    | I <sub>r</sub> |
| 113                                                                                 | NC_006677 | Gluconobacter oxydans 621H                                     | 2702173 | 1.1275         |
| 114                                                                                 | NC_002940 | Haemophilus ducreyi 35000HP                                    | 1698955 | 2.8218         |
| 115                                                                                 | NC_007146 | Haemophilus influenzae 86-028NP                                | 1913428 | 1.3796         |
| 116                                                                                 | NC_000907 | Haemophilus influenzae Rd KW20                                 | 1830138 | 1.8248         |
| 117                                                                                 | NC_007645 | Hahella chejuensis KCTC 2396                                   | 7215267 | 0.8519         |
| 118                                                                                 | NC_006396 | Haloarcula marismortui ATCC 43049                              | 3131724 | 0.2318         |
| 119                                                                                 | NC_002607 | Halobacterium sp. NRC-1                                        | 2014239 | 0.3272         |
| 120                                                                                 | NC_004917 | Helicobacter hepaticus ATCC 51449                              | 1799146 | 0.3778         |
| 121                                                                                 | NC_000915 | Helicobacter pylori 26695                                      | 1667867 | 1.5229         |
| 122                                                                                 | NC_000921 | Helicobacter pylori J99                                        | 1643831 | 0.9450         |
| 123                                                                                 | NC_006512 | Idiomarina loihiensis L2TR                                     | 2839318 | 0.8116         |
| 124                                                                                 | NC_007802 | Jannaschia sp. CCS1                                            | 4317977 | 0.1633         |
| 125                                                                                 | NC_006814 | Lactobacillus acidophilus NCFM                                 | 1993564 | 0.6904         |
| 126                                                                                 | NC_005362 | Lactobacillus johnsonii NCC 533                                | 1992676 | 1.6655         |
| 127                                                                                 | NC_004567 | Lactobacillus plantarum WCFS1                                  | 3308274 | 0.7578         |
| 128                                                                                 | NC_007576 | Lactobacillus sakei subsp. sakei 23K                           | 1884661 | 1.4584         |
| 129                                                                                 | NC_007929 | Lactobacillus salivarius subsp. salivarius UCC118              | 1827111 | 1.2714         |
| 130                                                                                 | NC_002662 | Lactococcus lactis subsp. lactis I1403                         | 2365589 | 1.5586         |
| 131                                                                                 | NC_006369 | Legionella pneumophila str. Lens                               | 3345687 | 0.9554         |
| 132                                                                                 | NC_006368 | Legionella pneumophila str. Paris                              | 3503610 | 0.8133         |
| 133                                                                                 | NC_002942 | Legionella pneumophila subsp. pneumophila str. Philadelphia 1  | 3397754 | 0.7081         |
| 134                                                                                 | NC_006087 | Leifsonia xyli subsp. xyli str. CTCB07                         | 2584158 | 1.3358         |
| 135                                                                                 | NC_005823 | Leptospira interrogans serovar Copenhageni str. Fiocruz L1-130 | 4277185 | 0.4965         |
| 136                                                                                 | NC_004342 | Leptospira interrogans serovar Lai str. 56601                  | 4332241 | 0.6134         |
| 137                                                                                 | NC_003212 | Listeria innocua Clip11262                                     | 3011208 | 1.8736         |
| 138                                                                                 | NC_003210 | Listeria monocytogenes EGD-e                                   | 2944528 | 1.0798         |
| 139                                                                                 | NC_002973 | Listeria monocytogenes str. 4b F2365                           | 2905187 | 1.1968         |
| 140                                                                                 | NC_007626 | Magnetospirillum magneticum AMB-1                              | 4967148 | 1.0752         |
| 141                                                                                 | NC_006300 | Mannheimia succiniciproducens MBEL55E                          | 2314078 | 1.0513         |
| 142                                                                                 | NC_006055 | Mesoplasma florum L1                                           | 793224  | 1.2860         |
| 143                                                                                 | NC_002678 | Mesorhizobium loti MAFF303099                                  | 7036071 | 0.5815         |
| 144                                                                                 | NC_000909 | Methanocaldococcus jannaschii DSM 2661                         | 1664970 | 0.2940         |
| 145                                                                                 | NC_007955 | Methanococcoides burtonii DSM 6242                             | 2575032 | 1.4029         |
| 146                                                                                 | NC_005791 | Methanococcus marisaludis S2                                   | 1661137 | 0.9724         |
| 147                                                                                 | NC_003551 | Methanopyrus kandleri AV19                                     | 1694969 | 0.0532         |
| 148                                                                                 | NC_003552 | Methanosarcina acetivorans C2A                                 | 5751492 | 1.2088         |
| 149                                                                                 | NC_007355 | Methanosarcina barkeri str. fusaro                             | 4837408 | 0.6314         |
| 150                                                                                 | NC_003901 | Methanosarcina mazei Go1                                       | 4096345 | 0.9588         |
| 151                                                                                 | NC_007681 | Methanosphaera stadtmanae DSM 3091                             | 1767403 | 0.8824         |
| 152                                                                                 | NC_007796 | Methanospirillum hungatei JF-1                                 | 3544738 | 1.2400         |
| 153                                                                                 | NC_000916 | Methanothermobacter thermautotrophicus str. Delta H            | 1751377 | 0.4256         |
| 154                                                                                 | NC_007947 | Methylobacillus flagellatus KT                                 | 2971517 | 6.3367         |
| 155                                                                                 | NC_002977 | Methylococcus capsulatus str. Bath                             | 3304561 | 1.1542         |
| 156                                                                                 | NC_007644 | Moorella thermoacetica ATCC 39073                              | 2628784 | 0.5089         |
| 157                                                                                 | NC_002944 | Mycobacterium avium subsp. paratuberculosis K-10               | 4829781 | 0.6248         |
| 158                                                                                 | NC_002945 | Mycobacterium bovis AF2122/97                                  | 4345492 | 0.4082         |
| 159                                                                                 | NC_002677 | Mycobacterium leprae TN                                        | 3268203 | 0.8330         |
| 160                                                                                 | NC_002755 | Mycobacterium tuberculosis CDC1551                             | 4403837 | 0.4530         |
| 161                                                                                 | NC_000962 | Mycobacterium tuberculosis H37Rv                               | 4411532 | 0.5647         |
| 162                                                                                 | NC_007633 | Mycoplasma capricolum subsp. capricolum ATCC 27343             | 1010023 | 0.3692         |
| 163                                                                                 | NC_004829 | Mycoplasma gallisepticum R                                     | 996422  | 0.7969         |
| 164                                                                                 | NC_000908 | Mycoplasma genitalium G37                                      | 580074  | 0.1377         |
| 165                                                                                 | NC_006360 | Mycoplasma hyopneumoniae 232                                   | 892758  | 0.3422         |
| 166                                                                                 | NC_007332 | Mycoplasma hyopneumoniae 7448                                  | 920079  | 1.0156         |
| 167                                                                                 | NC_007295 | Mycoplasma hyopneumoniae J                                     | 897405  | 0.6136         |
| 168                                                                                 | NC_006908 | Mycoplasma mobile 163K                                         | 777079  | 0.4222         |
| 169                                                                                 | NC_005364 | Mycoplasma mycoides subsp. mycoides SC str. PG1                | 1211703 | 2.9206         |

*Continued on next page*

| <i>Prokaryote I<sub>r</sub> sorted alphabetically, continued from previous page</i> |           |                                                       |         |                |
|-------------------------------------------------------------------------------------|-----------|-------------------------------------------------------|---------|----------------|
| No.                                                                                 | Accession | Organism                                              | Size    | I <sub>r</sub> |
| 170                                                                                 | NC_004432 | Mycoplasma penetrans HF-2                             | 1358633 | 0.7897         |
| 171                                                                                 | NC_000912 | Mycoplasma pneumoniae M129                            | 816394  | 0.3394         |
| 172                                                                                 | NC_002771 | Mycoplasma pulmonis UAB CTIP                          | 963879  | 0.7040         |
| 173                                                                                 | NC_007294 | Mycoplasma synoviae 53                                | 799476  | 0.8568         |
| 174                                                                                 | NC_005213 | Nanoarchaeum equitans Kin4-M                          | 490885  | 0.0482         |
| 175                                                                                 | NC_007426 | Natronomonas pharaonis DSM 2160                       | 2595221 | 0.1352         |
| 176                                                                                 | NC_002946 | Neisseria gonorrhoeae FA 1090                         | 2153922 | 1.6629         |
| 177                                                                                 | NC_003112 | Neisseria meningitidis MC58                           | 2272360 | 3.8422         |
| 178                                                                                 | NC_003116 | Neisseria meningitidis Z2491                          | 2184406 | 1.7507         |
| 179                                                                                 | NC_007798 | Neorickettsia sennetsu str. Miyayama                  | 859006  | 0.0452         |
| 180                                                                                 | NC_007964 | Nitrobacter hamburgensis X14                          | 4406967 | 1.1275         |
| 181                                                                                 | NC_007406 | Nitrobacter winogradskyi Nb-255                       | 3402093 | 1.3616         |
| 182                                                                                 | NC_007484 | Nitrosococcus oceani ATCC 19707                       | 3481691 | 0.5504         |
| 183                                                                                 | NC_004757 | Nitrosomonas europaea ATCC 19718                      | 2812094 | 1.7172         |
| 184                                                                                 | NC_007614 | Nitrosospira multififormis ATCC 25196                 | 3184243 | 1.2264         |
| 185                                                                                 | NC_006361 | Nocardia farcinica IFM 10152                          | 6021225 | 0.2595         |
| 186                                                                                 | NC_003272 | Nostoc sp. PCC 7120                                   | 6413771 | 0.7108         |
| 187                                                                                 | NC_007794 | Novosphingobium aromaticivorans DSM 12444             | 3561584 | 0.8086         |
| 188                                                                                 | NC_004193 | Oceanobacillus iheyensis HTE831                       | 3630528 | 1.2412         |
| 189                                                                                 | NC_005303 | Onion yellows phytoplasma OY-M                        | 860631  | 2.5371         |
| 190                                                                                 | NC_002663 | Pasteurella multocida subsp. multocida str. Pm70      | 2257487 | 0.9920         |
| 191                                                                                 | NC_007498 | Pelobacter carbinolicus DSM 2380                      | 3665893 | 0.7718         |
| 192                                                                                 | NC_007512 | Pelodictyon luteolum DSM 273                          | 2364842 | 1.3541         |
| 193                                                                                 | NC_006370 | Photobacterium profundum SS9                          | 4085304 | 1.3569         |
| 194                                                                                 | NC_005126 | Photorhabdus luminescens subsp. laumondii TTO1        | 5688987 | 1.8043         |
| 195                                                                                 | NC_005877 | Picrophilus torridus DSM 9790                         | 1545895 | 0.0702         |
| 196                                                                                 | NC_007948 | Polaromonas sp. JS666                                 | 5200264 | 0.3134         |
| 197                                                                                 | NC_002950 | Porphyromonas gingivalis W83                          | 2343476 | 1.7821         |
| 198                                                                                 | NC_007577 | Prochlorococcus marinus str. MIT 9312                 | 1709204 | 0.1503         |
| 199                                                                                 | NC_005071 | Prochlorococcus marinus str. MIT 9313                 | 2410873 | 1.0086         |
| 200                                                                                 | NC_007335 | Prochlorococcus marinus str. NATL2A                   | 1842899 | 0.3312         |
| 201                                                                                 | NC_005042 | Prochlorococcus marinus subsp. marinus str. CCMP1375  | 1751080 | 0.0373         |
| 202                                                                                 | NC_005072 | Prochlorococcus marinus subsp. pastoris str. CCMP1986 | 1657990 | 0.1149         |
| 203                                                                                 | NC_006085 | Propionibacterium acnes KPA171202                     | 2560265 | 0.5514         |
| 204                                                                                 | NC_007481 | Pseudoalteromonas haloplanktis TAC125                 | 3214944 | 1.1189         |
| 205                                                                                 | NC_002516 | Pseudomonas aeruginosa PAO1                           | 6264403 | 0.8098         |
| 206                                                                                 | NC_004129 | Pseudomonas fluorescens Pf-5                          | 7074893 | 0.5945         |
| 207                                                                                 | NC_007492 | Pseudomonas fluorescens PfO-1                         | 6438405 | 0.7972         |
| 208                                                                                 | NC_002947 | Pseudomonas putida KT2440                             | 6181863 | 0.9178         |
| 209                                                                                 | NC_005773 | Pseudomonas syringae pv. phaseolicola 1448A           | 5928787 | 1.2336         |
| 210                                                                                 | NC_007005 | Pseudomonas syringae pv. syringae B728a               | 6093698 | 0.5924         |
| 211                                                                                 | NC_004578 | Pseudomonas syringae pv. tomato str. DC3000           | 6397126 | 1.4096         |
| 212                                                                                 | NC_007204 | Psychrobacter arcticus 273-4                          | 2650701 | 1.3618         |
| 213                                                                                 | NC_003364 | Pyrobaculum aerophilum str. IM2                       | 2222430 | 0.3478         |
| 214                                                                                 | NC_000868 | Pyrococcus abyssi GE5                                 | 1765118 | 0.0713         |
| 215                                                                                 | NC_003413 | Pyrococcus furiosus DSM 3638                          | 1908256 | 0.3974         |
| 216                                                                                 | NC_000961 | Pyrococcus horikoshii OT3                             | 1738505 | 0.0856         |
| 217                                                                                 | NC_007348 | Ralstonia eutropha JMP134                             | 2726152 | 0.4505         |
| 218                                                                                 | NC_003295 | Ralstonia solanacearum GMI1000                        | 3716413 | 0.9614         |
| 219                                                                                 | NC_007761 | Rhizobium etli CFN 42                                 | 4381608 | 0.9900         |
| 220                                                                                 | NC_007493 | Rhodobacter sphaeroides 2.4.1                         | 3188609 | 0.0892         |
| 221                                                                                 | NC_007908 | Rhodospirillum rubrum DSM 15236                       | 4712337 | 0.7239         |
| 222                                                                                 | NC_005027 | Rhodopirellula baltica SH 1                           | 7145576 | 0.5292         |
| 223                                                                                 | NC_007925 | Rhodospseudomonas palustris BisB18                    | 5513844 | 0.5676         |
| 224                                                                                 | NC_007958 | Rhodospseudomonas palustris BisB5                     | 4892717 | 0.5391         |
| 225                                                                                 | NC_005296 | Rhodospseudomonas palustris CGA009                    | 5459213 | 0.4375         |
| 226                                                                                 | NC_007778 | Rhodospseudomonas palustris HaA2                      | 5331656 | 0.1193         |

*Continued on next page*

| <i>Prokaryote I<sub>r</sub> sorted alphabetically, continued from previous page</i> |           |                                                                        |         |                |
|-------------------------------------------------------------------------------------|-----------|------------------------------------------------------------------------|---------|----------------|
| No.                                                                                 | Accession | Organism                                                               | Size    | I <sub>r</sub> |
| 227                                                                                 | NC_007643 | Rhodospirillum rubrum ATCC 11170                                       | 4352825 | 0.6971         |
| 228                                                                                 | NC_007940 | Rickettsia bellii RML369-C                                             | 1522076 | 0.7991         |
| 229                                                                                 | NC_003103 | Rickettsia conorii str. Malish 7                                       | 1268755 | 0.0968         |
| 230                                                                                 | NC_007109 | Rickettsia felis URRWXCal2                                             | 1485148 | 0.9924         |
| 231                                                                                 | NC_000963 | Rickettsia prowazekii str. Madrid E                                    | 1111523 | 0.0514         |
| 232                                                                                 | NC_006142 | Rickettsia typhi str. Wilmington                                       | 1111496 | 0.0607         |
| 233                                                                                 | NC_007912 | Saccharophagus degradans 2-40                                          | 5057531 | 0.4931         |
| 234                                                                                 | NC_007677 | Salinibacter ruber DSM 13855                                           | 3551823 | 0.1685         |
| 235                                                                                 | NC_006905 | Salmonella enterica subsp. enterica serovar Choleraesuis str. SC-B67   | 4755700 | 0.9917         |
| 236                                                                                 | NC_006511 | Salmonella enterica subsp. enterica serovar Paratyphi A str. ATCC 9150 | 4585229 | 1.1117         |
| 237                                                                                 | NC_004631 | Salmonella enterica subsp. enterica serovar Typhi Ty2                  | 4791961 | 1.2962         |
| 238                                                                                 | NC_003198 | Salmonella enterica subsp. enterica serovar Typhi str. CT18            | 4809037 | 1.5869         |
| 239                                                                                 | NC_003197 | Salmonella typhimurium LT2                                             | 4857432 | 1.0644         |
| 240                                                                                 | NC_007954 | Shewanella denitrificans OS217                                         | 4545906 | 1.6284         |
| 241                                                                                 | NC_004347 | Shewanella oneidensis MR-1                                             | 4969803 | 1.4534         |
| 242                                                                                 | NC_007613 | Shigella boydii Sb227                                                  | 4519823 | 1.9191         |
| 243                                                                                 | NC_007606 | Shigella dysenteriae Sd197                                             | 4369232 | 1.8411         |
| 244                                                                                 | NC_004741 | Shigella flexneri 2a str. 2457T                                        | 4599354 | 1.6136         |
| 245                                                                                 | NC_004337 | Shigella flexneri 2a str. 301                                          | 4607203 | 2.1937         |
| 246                                                                                 | NC_007384 | Shigella sonnei Ss046                                                  | 4825265 | 1.7863         |
| 247                                                                                 | NC_003911 | Silicibacter pomeroyi DSS-3                                            | 4109442 | 1.0099         |
| 248                                                                                 | NC_003047 | Sinorhizobium meliloti 1021                                            | 3654135 | 1.1582         |
| 249                                                                                 | NC_007712 | Sodalis glossinidius str. 'morsitans'                                  | 4171146 | 2.6269         |
| 250                                                                                 | NC_007622 | Staphylococcus aureus RF122                                            | 2742531 | 0.7407         |
| 251                                                                                 | NC_002951 | Staphylococcus aureus subsp. aureus COL                                | 2809422 | 0.7696         |
| 252                                                                                 | NC_002952 | Staphylococcus aureus subsp. aureus MRSA252                            | 2902619 | 1.3114         |
| 253                                                                                 | NC_002953 | Staphylococcus aureus subsp. aureus MSSA476                            | 2799802 | 0.6539         |
| 254                                                                                 | NC_003923 | Staphylococcus aureus subsp. aureus MW2                                | 2820462 | 0.6857         |
| 255                                                                                 | NC_002758 | Staphylococcus aureus subsp. aureus Mu50                               | 2878529 | 1.3249         |
| 256                                                                                 | NC_002745 | Staphylococcus aureus subsp. aureus N315                               | 2814816 | 1.7159         |
| 257                                                                                 | NC_007795 | Staphylococcus aureus subsp. aureus NCTC 8325                          | 2821361 | 0.5725         |
| 258                                                                                 | NC_007793 | Staphylococcus aureus subsp. aureus USA300                             | 2872769 | 0.6384         |
| 259                                                                                 | NC_004461 | Staphylococcus epidermidis ATCC 12228                                  | 2499279 | 0.7623         |
| 260                                                                                 | NC_002976 | Staphylococcus epidermidis RP62A                                       | 2616530 | 1.5083         |
| 261                                                                                 | NC_007168 | Staphylococcus haemolyticus JCSC1435                                   | 2685015 | 1.3731         |
| 262                                                                                 | NC_007350 | Staphylococcus saprophyticus subsp. saprophyticus ATCC 15305           | 2516575 | 0.8694         |
| 263                                                                                 | NC_004116 | Streptococcus agalactiae 2603V/R                                       | 2160267 | 1.7840         |
| 264                                                                                 | NC_007432 | Streptococcus agalactiae A909                                          | 2127839 | 1.7154         |
| 265                                                                                 | NC_004368 | Streptococcus agalactiae NEM316                                        | 2211485 | 4.8417         |
| 266                                                                                 | NC_004350 | Streptococcus mutans UA159                                             | 2030921 | 1.5233         |
| 267                                                                                 | NC_003098 | Streptococcus pneumoniae R6                                            | 2038615 | 1.4171         |
| 268                                                                                 | NC_003028 | Streptococcus pneumoniae TIGR4                                         | 2160837 | 1.6901         |
| 269                                                                                 | NC_002737 | Streptococcus pyogenes M1 GAS                                          | 1852441 | 1.1711         |
| 270                                                                                 | NC_006086 | Streptococcus pyogenes MGAS10394                                       | 1899877 | 1.8149         |
| 271                                                                                 | NC_004070 | Streptococcus pyogenes MGAS315                                         | 1900521 | 1.7159         |
| 272                                                                                 | NC_007297 | Streptococcus pyogenes MGAS5005                                        | 1838554 | 1.7275         |
| 273                                                                                 | NC_007296 | Streptococcus pyogenes MGAS6180                                        | 1897573 | 1.7299         |
| 274                                                                                 | NC_003485 | Streptococcus pyogenes MGAS8232                                        | 1895017 | 1.8374         |
| 275                                                                                 | NC_004606 | Streptococcus pyogenes SSI-1                                           | 1894275 | 1.7407         |
| 276                                                                                 | NC_006449 | Streptococcus thermophilus CNRZ1066                                    | 1796226 | 1.7684         |
| 277                                                                                 | NC_006448 | Streptococcus thermophilus LMG 18311                                   | 1796846 | 1.6730         |
| 278                                                                                 | NC_003155 | Streptomyces avermitilis MA-4680                                       | 9025608 | 0.6095         |
| 279                                                                                 | NC_003888 | Streptomyces coelicolor A3(2)                                          | 8667507 | 1.2834         |
| 280                                                                                 | NC_007181 | Sulfolobus acidocaldarius DSM 639                                      | 2225959 | 0.0428         |
| 281                                                                                 | NC_002754 | Sulfolobus solfataricus P2                                             | 2992245 | 1.3393         |
| 282                                                                                 | NC_003106 | Sulfolobus tokodaii str. 7                                             | 2694756 | 0.3584         |
| 283                                                                                 | NC_006177 | Symbiobacterium thermophilum IAM 14863                                 | 3566135 | 1.1146         |

*Continued on next page*

| <i>Prokaryote I<sub>r</sub> sorted alphabetically, continued from previous page</i> |           |                                                                               |         |                |
|-------------------------------------------------------------------------------------|-----------|-------------------------------------------------------------------------------|---------|----------------|
| No.                                                                                 | Accession | Organism                                                                      | Size    | I <sub>r</sub> |
| 284                                                                                 | NC_006576 | <i>Synechococcus elongatus</i> PCC 6301                                       | 2696255 | 0.6855         |
| 285                                                                                 | NC_007604 | <i>Synechococcus elongatus</i> PCC 7942                                       | 2695903 | 0.6997         |
| 286                                                                                 | NC_007516 | <i>Synechococcus</i> sp. CC9605                                               | 2510659 | 0.9301         |
| 287                                                                                 | NC_007513 | <i>Synechococcus</i> sp. CC9902                                               | 2234828 | 0.9351         |
| 288                                                                                 | NC_007776 | <i>Synechococcus</i> sp. JA-2-3B'a(2-13)                                      | 3046682 | 0.6063         |
| 289                                                                                 | NC_007775 | <i>Synechococcus</i> sp. JA-3-3Ab                                             | 2932766 | 0.8916         |
| 290                                                                                 | NC_005070 | <i>Synechococcus</i> sp. WH 8102                                              | 2434428 | 0.6132         |
| 291                                                                                 | NC_000911 | <i>Synechocystis</i> sp. PCC 6803                                             | 3573470 | 0.7764         |
| 292                                                                                 | NC_007759 | <i>Syntrophus aciditrophicus</i> SB                                           | 3179300 | 0.7056         |
| 293                                                                                 | NC_003869 | <i>Thermoanaerobacter tengcongensis</i> MB4                                   | 2689445 | 1.4486         |
| 294                                                                                 | NC_007333 | <i>Thermobifida fusca</i> YX                                                  | 3642249 | 0.6165         |
| 295                                                                                 | NC_006624 | <i>Thermococcus kodakarensis</i> KOD1                                         | 2088737 | 0.4197         |
| 296                                                                                 | NC_002578 | <i>Thermoplasma acidophilum</i> DSM 1728                                      | 1564906 | 0.0577         |
| 297                                                                                 | NC_002689 | <i>Thermoplasma volcanium</i> GSS1                                            | 1584804 | 0.1651         |
| 298                                                                                 | NC_004113 | <i>Thermosynechococcus elongatus</i> BP-1                                     | 2593857 | 0.9895         |
| 299                                                                                 | NC_000853 | <i>Thermotoga maritima</i> MSB8                                               | 1860725 | 0.1608         |
| 300                                                                                 | NC_005835 | <i>Thermus thermophilus</i> HB27                                              | 1894877 | 0.5242         |
| 301                                                                                 | NC_006461 | <i>Thermus thermophilus</i> HB8                                               | 1849742 | 0.6630         |
| 302                                                                                 | NC_007404 | <i>Thiobacillus denitrificans</i> ATCC 25259                                  | 2909809 | 0.6284         |
| 303                                                                                 | NC_007520 | <i>Thiomicrospira crunogena</i> XCL-2                                         | 2427734 | 1.3829         |
| 304                                                                                 | NC_007575 | <i>Thiomicrospira denitrificans</i> ATCC 33889                                | 2201561 | 2.6811         |
| 305                                                                                 | NC_002967 | <i>Treponema denticola</i> ATCC 35405                                         | 2843201 | 0.5407         |
| 306                                                                                 | NC_000919 | <i>Treponema pallidum</i> subsp. <i>pallidum</i> str. Nichols                 | 1138011 | 0.9307         |
| 307                                                                                 | NC_004551 | <i>Tropheryma whippelii</i> TW08/27                                           | 925938  | 1.7737         |
| 308                                                                                 | NC_004572 | <i>Tropheryma whippelii</i> str. Twist                                        | 927303  | 1.5277         |
| 309                                                                                 | NC_002162 | <i>Ureaplasma parvum</i> serovar 3 str. ATCC 700970                           | 751719  | 0.5090         |
| 310                                                                                 | NC_002505 | <i>Vibrio cholerae</i> O1 biovar <i>eltor</i> str. N16961                     | 2961149 | 0.9737         |
| 311                                                                                 | NC_006840 | <i>Vibrio fischeri</i> ES114                                                  | 2906179 | 0.9957         |
| 312                                                                                 | NC_004603 | <i>Vibrio parahaemolyticus</i> RIMD 2210633                                   | 3288558 | 1.1373         |
| 313                                                                                 | NC_004459 | <i>Vibrio vulnificus</i> CMCP6                                                | 3281945 | 1.0189         |
| 314                                                                                 | NC_005139 | <i>Vibrio vulnificus</i> YJ016                                                | 3354505 | 0.9815         |
| 315                                                                                 | NC_004344 | <i>Wigglesworthia glossinidia</i> endosymbiont of <i>Glossina brevipalpis</i> | 697724  | 1.3027         |
| 316                                                                                 | NC_002978 | <i>Wolbachia</i> endosymbiont of <i>Drosophila melanogaster</i>               | 1267782 | 1.6783         |
| 317                                                                                 | NC_006833 | <i>Wolbachia</i> endosymbiont strain TRS of <i>Brugia malayi</i>              | 1080084 | 0.9679         |
| 318                                                                                 | NC_005090 | <i>Wolinella succinogenes</i> DSM 1740                                        | 2110355 | 1.4649         |
| 319                                                                                 | NC_003919 | <i>Xanthomonas axonopodis</i> pv. <i>citri</i> str. 306                       | 5175554 | 0.6897         |
| 320                                                                                 | NC_007086 | <i>Xanthomonas campestris</i> pv. <i>campestris</i> str. 8004                 | 5148708 | 0.7958         |
| 321                                                                                 | NC_003902 | <i>Xanthomonas campestris</i> pv. <i>campestris</i> str. ATCC 33913           | 5076188 | 0.9445         |
| 322                                                                                 | NC_007508 | <i>Xanthomonas campestris</i> pv. <i>vesicatoria</i> str. 85-10               | 5178466 | 0.6424         |
| 323                                                                                 | NC_006834 | <i>Xanthomonas oryzae</i> pv. <i>oryzae</i> KACC10331                         | 4941439 | 1.5119         |
| 324                                                                                 | NC_002488 | <i>Xylella fastidiosa</i> 9a5c                                                | 2679306 | 2.7542         |
| 325                                                                                 | NC_004556 | <i>Xylella fastidiosa</i> Temecula1                                           | 2519802 | 2.2695         |
| 326                                                                                 | NC_003143 | <i>Yersinia pestis</i> CO92                                                   | 4653728 | 1.3248         |
| 327                                                                                 | NC_004088 | <i>Yersinia pestis</i> KIM                                                    | 4600755 | 1.4926         |
| 328                                                                                 | NC_005810 | <i>Yersinia pestis</i> biovar <i>Medievalis</i> str. 91001                    | 4595065 | 1.3053         |
| 329                                                                                 | NC_006155 | <i>Yersinia pseudotuberculosis</i> IP 32953                                   | 4744671 | 0.8542         |
| 330                                                                                 | NC_006526 | <i>Zymomonas mobilis</i> subsp. <i>mobilis</i> ZM4                            | 2056416 | 1.1722         |
